# Supplementary material for: Viral and Immunologic Factors Associated with Fatal Outcome of Patients with Severe Fever with Thrombocytopenia Syndrome in Korea
Source: MDPI journal article supplement (doi:10.3390/v13122351), 2021-11-23
Supplement: s1 [file s1]

**Table S1.** Correlation of cytokine and chemokine levels with levels of initial viral RNA from blood in patients with SFTS.

| Cytokines/Chemokines | Spearman r (95% CI)   | <i>p</i> Value |
|----------------------|-----------------------|----------------|
| GM-CSF               | 0.163 (−0.025–0.339)  | 0.079          |
| IFN- $\gamma$        | 0.546 (0.400–0.665)   | <0.0001        |
| IL-6                 | 0.432 (0.267–0.573)   | <0.0001        |
| IL-8                 | 0.515 (0.363–0.640)   | <0.0001        |
| IP-10                | 0.797 (0.717–0.857)   | <0.0001        |
| MCP-1                | 0.688 (0.576–0.776)   | <0.0001        |
| RANTES               | −0.321 (−0.479–0.143) | 0.0004         |
| VEGF                 | −0.199 (−0.372–0.013) | 0.032          |
| G-CSF                | 0.317 (0.138–0.475)   | 0.0005         |
| IFN- $\alpha$        | 0.730 (0.629–0.807)   | <0.0001        |
| IL-10                | 0.649 (0.526–0.746)   | <0.0001        |
| IL-12p40             | 0.059 (−0.129–0.243)  | 0.528          |
| IL-13                | −0.004 (−0.191–0.182) | 0.961          |
| IL-17A               | 0.048 (−0.141–0.232)  | 0.611          |
| IL-1 $\beta$         | 0.107 (−0.081–0.288)  | 0.250          |
| MIP-1 $\alpha$       | 0.596 (0.461–0.705)   | <0.0001        |
| TNF $\alpha$         | 0.074 (−0.114–0.257)  | 0.427          |

**Table S2.** Comparison of initial cytokine and chemokine levels of survivor SFTS patients upon ICU admission.

|                                          | ICU−<br>( <i>n</i> = 27) | ICU+<br>( <i>n</i> = 10) | <i>p</i> Value |
|------------------------------------------|--------------------------|--------------------------|----------------|
| Days from admission (days), median (IQR) | 2.0 (1.0–3.0)            | 2.0 (1.75–5.75)          | 0.498          |
| GM-CSF (pg/mL), median (IQR)             | 0.0 (0.0–4.2)            | 0.0 (0.0–6.7)            | 0.540          |
| IFN- $\gamma$ (pg/mL), median (IQR)      | 26.0 (12.2–53.8)         | 33.9 (19.7–158.5)        | 0.268          |
| IL-6 (pg/mL), median (IQR)               | 13.7 (7.5–33.0)          | 112.8 (87.3–147.2)       | <0.0001        |
| IL-8 (pg/mL), median (IQR)               | 28.6 (16.5–43.2)         | 91.2 (41.7–241.0)        | 0.002          |
| IP-10 (pg/mL), median (IQR)              | 2152 (1527–4438)         | 8269 (1303–11429)        | 0.091          |
| MCP-1 (pg/mL), median (IQR)              | 181.8 (62.6–436.7)       | 423.0 (110.2–827.0)      | 0.137          |
| RANTES (pg/mL), median (IQR)             | 5904 (2952–11893)        | 2365 (1720–4042)         | 0.052          |
| VEGF (pg/mL), median (IQR)               | 20.3 (11.6–65.7)         | 18.3 (0–32.0)            | 0.394          |
| G-CSF (pg/mL), median (IQR)              | 17.0 (10.8–23.0)         | 15.0 (12.7–36.8)         | 0.516          |
| IFN- $\alpha$ (pg/mL), median (IQR)      | 23.0 (10.6–473.8)        | 338.7 (81.4–5121.0)      | 0.051          |
| IL-10 (pg/mL), median (IQR)              | 14.3 (6.2–27.7)          | 51.9 (10.1–98.8)         | 0.047          |
| IL-12p40 (pg/mL), median (IQR)           | 119.5 (83.9–216.7)       | 112.8 (61.4–220.5)       | 0.668          |
| IL-13 (pg/mL), median (IQR)              | 2.4 (1.4–4.0)            | 1.6 (0.3–4.4)            | 0.384          |
| IL-17A (pg/mL), median (IQR)             | 4.4 (2.3–10.2)           | 9.3 (1.5–14.5)           | 0.644          |
| IL-1 $\beta$ (pg/mL), median (IQR)       | 3.6 (2.0–7.5)            | 3.1 (2.2–6.9)            | 0.980          |
| MIP-1 $\alpha$ (pg/mL), median (IQR)     | 9.8 (7.3–15.0)           | 18.6 (11.7–44.5)         | 0.008          |
| TNF $\alpha$ (pg/mL), median (IQR)       | 2.5 (0.0–12.8)           | 5.1 (0.0–8.9)            | 0.645          |

**Table S3.** Comparison of initial cytokine and chemokine levels of survivor SFTS patients with CNS involvement.

|                                          | CNS–<br>( <i>n</i> = 23) | CNS+<br>( <i>n</i> = 14) | <i>p</i> Value |
|------------------------------------------|--------------------------|--------------------------|----------------|
| Days from admission (days), median (IQR) | 2.0 (1.0–3.0)            | 2.5 (2.0–5.0)            | 0.151          |
| GM-CSF (pg/mL), median (IQR)             | 0.0 (0.0–3.4)            | 0.0 (0.0–25.8)           | 0.482          |
| IFN- $\gamma$ (pg/mL), median (IQR)      | 26.0 (12.2–73.4)         | 31.1 (19.7–51.1)         | 0.920          |
| IL-6 (pg/mL), median (IQR)               | 11.3 (6.6–46.5)          | 75.8 (28.6–124.6)        | 0.001          |
| IL-8 (pg/mL), median (IQR)               | 27.3 (12.5–43.2)         | 78.6 (32.1–423.0)        | 0.003          |
| IP-10 (pg/mL), median (IQR)              | 1836 (1392–4846)         | 4243 (1589–7348)         | 0.244          |
| MCP-1 (pg/mL), median (IQR)              | 181.2 (62.6–448.9)       | 294.2 (124.0–600.1)      | 0.228          |
| RANTES (pg/mL), median (IQR)             | 4718 (2444–11893)        | 4168 (1517–9048)         | 0.412          |
| VEGF (pg/mL), median (IQR)               | 19.9 (9.2–19.6)          | 21.1 (9.3–54.7)          | 0.835          |
| G-CSF (pg/mL), median (IQR)              | 14.8 (10.8–23.0)         | 17.4 (14.0–39.8)         | 0.168          |
| IFN- $\alpha$ (pg/mL), median (IQR)      | 30.8 (10.6–292.5)        | 338.7 (19.8–3779.0)      | 0.154          |
| IL-10 (pg/mL), median (IQR)              | 15.1 (6.2–57.6)          | 25.7 (10.0–58.9)         | 0.531          |
| IL-12p40 (pg/mL), median (IQR)           | 125.2 (76.4–228.5)       | 116.3 (63.0–169.1)       | 0.501          |
| IL-13 (pg/mL), median (IQR)              | 2.4 (1.0–2.8)            | 1.9 (0.7–4.6)            | 0.775          |
| IL-17A (pg/mL), median (IQR)             | 4.4 (3.0–10.4)           | 7.3 (0.5–14.5)           | 0.982          |
| IL-1 $\beta$ (pg/mL), median (IQR)       | 3.6 (2.0–9.7)            | 3.1 (2.0–9.7)            | 0.871          |
| MIP-1 $\alpha$ (pg/mL), median (IQR)     | 11.7 (8.4–16.7)          | 14.5 (8.5–20.9)          | 0.531          |
| TNF $\alpha$ (pg/mL), median (IQR)       | 2.5 (0.0–10.0)           | 4.2 (0.0–11.5)           | 0.480          |

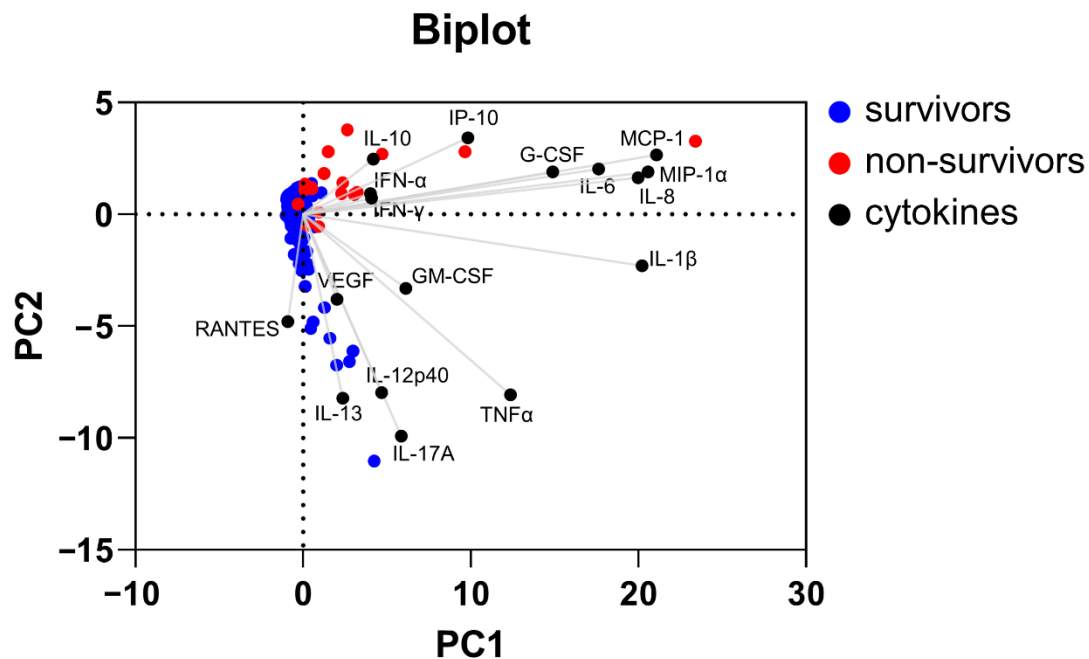

**Figure S1.** Principal component analysis (PCA) biplot of the entire dataset from 44 SFTS patients, plotted along PC1 and PC2.
